# Supplementary material
Source: Springer Nature journal article supplement (https://www.springermedizin.de/resource/supplementary/12935_2009_245_MOESM3_ESM.pdf/9540136)

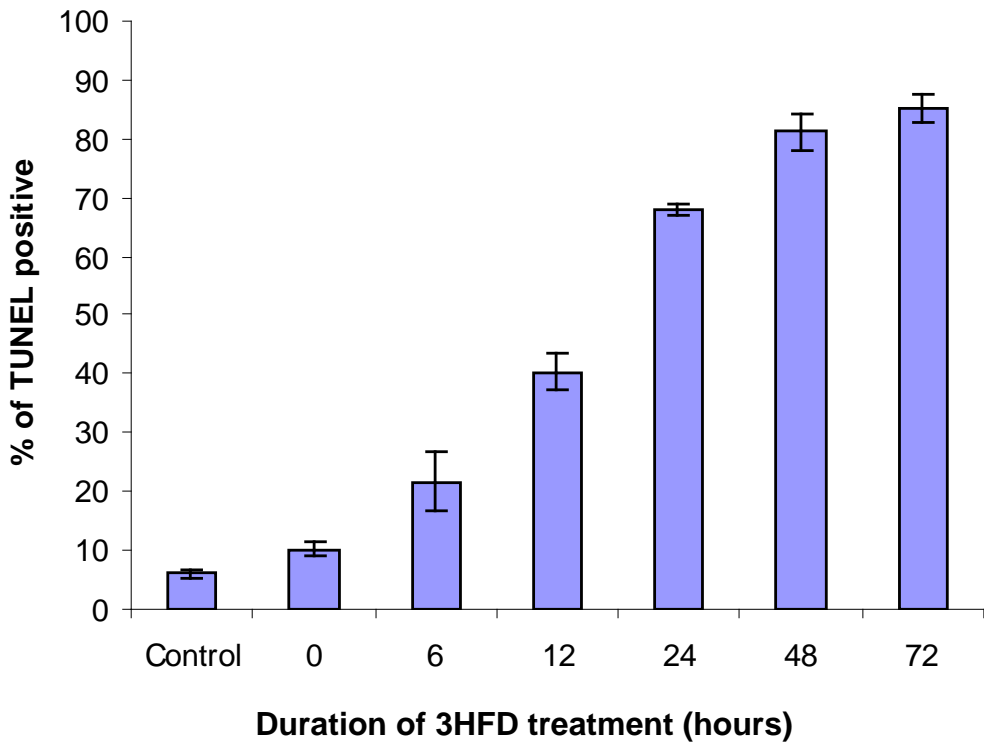

Supplement: MOESM3 [file 9540136]
